# Supplementary material
Source: MDPI journal article supplement (https://www.mdpi.com/2073-4441/15/8/1594)
Supplement: s1 [file s1]

**Table S1.** The characteristics of the spring hydrograph in scenario A.

| Parameter<br>Scenario A               | $Q_P$<br>( $m^3/s$ ) | $q_0^b$<br>( $m^3/s$ ) | $t_P$ (hr) | $t_b$ (hr) | $\alpha_f$<br>(1/hr) | $\alpha_i$<br>(1/hr) | $\alpha_b$<br>(1/hr) | $V_f/V_T$ (%) | $V_i/V_T$ (%) | $V_b/V_T$ (%) |
|---------------------------------------|----------------------|------------------------|------------|------------|----------------------|----------------------|----------------------|---------------|---------------|---------------|
| A1: Curvilinear<br>branchwork pattern | 1.46                 | 0.26                   | 2          | 62         | 0.077                | 0.05                 | 0.033                | 24.02         | 36.47         | 39.51         |
| A2: Rectilinear<br>branchwork pattern | 1.15                 | 0.36                   | 2          | 69         | 0.057                | 0.044                | 0.034                | 22.64         | 25.98         | 51.38         |
| A3: Network maze<br>pattern           | 0.94                 | 0.38                   | 2          | 77         | 0.046                | 0.042                | 0.033                | 13.36         | 30.69         | 55.95         |

**Table S2.** The characteristics of the spring hydrograph in scenario B.

| Parameter<br>Scenario B        |                                                  | $Q_P$<br>( $m^3/s$ ) | $q_0^b$<br>( $m^3/s$ ) | $t_P$ (hr) | $t_b$ (hr) | $\alpha_f$<br>(1/hr) | $\alpha_i$<br>(1/hr) | $\alpha_b$<br>(1/hr) | $V_f/V_T$ (%) | $V_i/V_T$ (%) | $V_b/V_T$ (%) |
|--------------------------------|--------------------------------------------------|----------------------|------------------------|------------|------------|----------------------|----------------------|----------------------|---------------|---------------|---------------|
| Curvilinear branchwork pattern | B1: base model                                   | 1.46                 | 0.26                   | 2          | 62         | 0.077                | 0.05                 | 0.033                | 24.02         | 36.47         | 39.51         |
|                                | B2: 25% reduction of<br>the length of base model | 1.24                 | 0.4                    | 2          | 57         | 0.064                | 0.04                 | 0.03                 | 18.1          | 20.1          | 61.8          |
|                                | B3: 50% reduction of<br>the length of base model | 0.9                  | 0.17                   | 2          | 51         | 0.062                | 0.032                | 0.015                | 16.88         | 25.45         | 57.67         |
|                                | B4: 75% reduction of<br>the length of base model | 0.46                 | 0.15                   | 2          | 47         | 0.053                | 0.021                | 0.01                 | 7.77          | 10.09         | 82.14         |
| Rectilinear branchwork pattern | B1: base model                                   | 1.15                 | 0.36                   | 2          | 69         | 0.057                | 0.044                | 0.034                | 22.64         | 25.98         | 51.38         |
|                                | B2: 25% reduction of<br>the length of base model | 0.99                 | 0.38                   | 2          | 66         | 0.048                | 0.038                | 0.03                 | 17.82         | 22.56         | 59.62         |
|                                | B3: 50% reduction of<br>the length of base model | 0.79                 | 0.2                    | 2          | 49         | 0.052                | 0.032                | 0.015                | 14.32         | 20.49         | 65.19         |
|                                | B4: 75% reduction of<br>the length of base model | 0.39                 | 0.15                   | 2          | 42         | 0.046                | 0.019                | 0.009                | 6.46          | 5.89          | 87.65         |
| Network maze pattern           | B1: base model                                   | 0.94                 | 0.38                   | 2          | 77         | 0.046                | 0.042                | 0.033                | 13.36         | 30.69         | 55.95         |
|                                | B2: 25% reduction of<br>the length of base model | 0.84                 | 0.31                   | 2          | 57         | 0.045                | 0.033                | 0.022                | 11.55         | 23.01         | 65.44         |
|                                | B3: 50% reduction of<br>the length of base model | 0.68                 | 0.14                   | 2          | 45         | 0.063                | 0.034                | 0.012                | 10.09         | 23.94         | 65.97         |
|                                | B4: 75% reduction of<br>the length of base model | 0.43                 | 0.11                   | 2          | 44         | 0.066                | 0.027                | 0.01                 | 8.5           | 12.55         | 78.95         |

**Table S3.** The characteristics of the spring hydrograph in scenario C.

| Scenario C                        |                                                    | Parameter | $Q_P$<br>( $m^3/s$ ) | $q_0^b$<br>( $m^3/s$ ) | $t_P$ (hr) | $t_b$ (hr) | $\alpha_f$<br>(1/hr) | $\alpha_i$<br>(1/hr) | $\alpha_b$<br>(1/hr) | $V_f/V_T$<br>(%) | $V_i/V_T$<br>(%) | $V_b/V_T$<br>(%) |
|-----------------------------------|----------------------------------------------------|-----------|----------------------|------------------------|------------|------------|----------------------|----------------------|----------------------|------------------|------------------|------------------|
| Curvilinear<br>branchwork pattern | C1: 100% diffuse recharge                          |           | 1.46                 | 0.26                   | 2          | 62         | 0.077                | 0.05                 | 0.033                | 24.02            | 36.47            | 39.51            |
|                                   | C2: 75% diffuse recharge<br>and 25% point recharge |           | 1.8                  | 0.16                   | 1          | 49         | 0.137                | 0.059                | 0.035                | 34.22            | 36.03            | 29.75            |
|                                   | C3: 50% diffuse recharge<br>and 50% point recharge |           | 2                    | 0.06                   | 1          | 44         | 0.42                 | 0.064                | 0.037                | 52.31            | 20.22            | 27.47            |
| Rectilinear<br>branchwork pattern | C1: 100% diffuse recharge                          |           | 1.15                 | 0.36                   | 2          | 69         | 0.057                | 0.044                | 0.034                | 22.64            | 25.98            | 51.38            |
|                                   | C2: 75% diffuse recharge<br>and 25% point recharge |           | 1.2                  | 0.22                   | 1          | 53         | 0.073                | 0.054                | 0.036                | 27.5             | 33.58            | 38.92            |
|                                   | C3: 50% diffuse recharge<br>and 50% point recharge |           | 1.36                 | 0.082                  | < 1        | 49         | 0.219                | 0.068                | 0.036                | 33.77            | 38.05            | 28.18            |
| Network maze<br>pattern           | C1: 100% diffuse recharge                          |           | 0.94                 | 0.38                   | 2          | 77         | 0.046                | 0.042                | 0.033                | 13.36            | 30.69            | 55.95            |
|                                   | C2: 75% diffuse recharge<br>and 25% point recharge |           | 1.01                 | 0.2                    | 1          | 68         | 0.059                | 0.051                | 0.033                | 22.37            | 40.32            | 37.31            |
|                                   | C3: 50% diffuse recharge<br>and 50% point recharge |           | 1.14                 | 0.05                   | < 1        | 59         | 0.118                | 0.085                | 0.041                | 26.71            | 60.94            | 12.35            |
